# Supplementary material
Source: PubMed Central journal article supplement (PMC8936041)
Supplement: 40264_2022_1151_MOESM1_ESM.pdf [file 40264_2022_1151_MOESM1_ESM.pdf]

## Electronic Supplemental material 1

### Description of frequencies of reported adverse events following immunization among four different COVID-19 vaccine brands

Drug Safety – Original Research

#### Author information

Agnes Kant<sup>1</sup>, Jurriaan Jansen<sup>1</sup>, Leontine van Balveren<sup>1</sup>, Florence van Hunsel<sup>1</sup>

#### Affiliations

<sup>1</sup> Netherlands Pharmacovigilance Centre Lareb, 's Hertogenbosch, the Netherlands.

**Correspondence:** f.vanhunsel@lareb.nl

**Table 1. Data on vaccines given in the Netherlands until 07-10-2021, stratified per age, sex and dose [1].**

| Age     | Gender | AstraZeneca 1st dose | AstraZeneca 2nd dose | Pfizer 1st dose | Pfizer 2nd dose | Moderna 1st dose | Moderna 2nd dose | Janssen 1st dose | Unknown brand 1st dose | Unknown brand 2nd dose |
|---------|--------|----------------------|----------------------|-----------------|-----------------|------------------|------------------|------------------|------------------------|------------------------|
| 10-19   | Female | 3328                 | 3164                 | 451676          | 360037          | 12787            | 10768            | 16095            | 12                     | 0                      |
| 20-29   | Female | 34717                | 32686                | 561687          | 470182          | 81756            | 72362            | 82039            | 29                     | 6                      |
| 30-39   | Female | 35095                | 32743                | 625176          | 547609          | 86964            | 79220            | 39795            | 35                     | 4                      |
| 40-49   | Female | 48377                | 45339                | 645926          | 580289          | 129740           | 119499           | 52887            | 31                     | 5                      |
| 50-59   | Female | 79861                | 75104                | 767458          | 708810          | 145776           | 135618           | 117116           | 38                     | 3                      |
| 60-69   | Female | 452144               | 429602               | 510542          | 485788          | 26245            | 24399            | 5123             | 11                     | 3                      |
| 70-79   | Female | 10374                | 9351                 | 784187          | 763707          | 13197            | 12257            | 1044             | 6                      | 3                      |
| 80-89   | Female | 8112                 | 6993                 | 388593          | 379603          | 7275             | 6407             | 317              | 7                      | 3                      |
| 90-99   | Female | 5841                 | 4933                 | 84673           | 80895           | 5690             | 5023             | 38               | 2                      | 2                      |
| 100-109 | Female | 245                  | 204                  | 2002            | 1810            | 293              | 244              | 3                | 0                      | 0                      |
| 110-119 | Female | 0                    | 0                    | 1               | 1               | 1                | 1                | 0                | 0                      | 0                      |
| unknown | Female | 5                    | 4                    | 1018            | 779             | 95               | 68               | 21               | 0                      | 0                      |

|                |                |        |        |        |        |        |        |        |     |    |
|----------------|----------------|--------|--------|--------|--------|--------|--------|--------|-----|----|
| <b>10-19</b>   | <b>Male</b>    | 1297   | 1194   | 464639 | 373564 | 12590  | 10444  | 24807  | 18  | 0  |
| <b>20-29</b>   | <b>Male</b>    | 12391  | 11665  | 556133 | 454684 | 74342  | 64104  | 137463 | 118 | 75 |
| <b>30-39</b>   | <b>Male</b>    | 14121  | 13403  | 650595 | 575441 | 79572  | 72588  | 54244  | 86  | 35 |
| <b>40-49</b>   | <b>Male</b>    | 18293  | 17434  | 647510 | 584143 | 126852 | 117747 | 61479  | 45  | 14 |
| <b>50-59</b>   | <b>Male</b>    | 29988  | 28566  | 790291 | 726561 | 157487 | 146801 | 142518 | 52  | 15 |
| <b>60-69</b>   | <b>Male</b>    | 498079 | 473302 | 457450 | 432458 | 29431  | 27528  | 5539   | 14  | 3  |
| <b>70-79</b>   | <b>Male</b>    | 11356  | 10303  | 734772 | 715116 | 15513  | 14628  | 1434   | 12  | 5  |
| <b>80-89</b>   | <b>Male</b>    | 5060   | 4290   | 292274 | 285953 | 3360   | 2988   | 327    | 7   | 3  |
| <b>90-99</b>   | <b>Male</b>    | 2355   | 1981   | 38244  | 36646  | 1597   | 1401   | 32     | 0   | 0  |
| <b>100-109</b> | <b>Male</b>    | 55     | 45     | 434    | 404    | 57     | 50     | 0      | 0   | 0  |
| <b>110-119</b> | <b>Male</b>    | 0      | 0      | 1      | 1      | 0      | 0      | 0      | 0   | 0  |
| <b>unknown</b> | <b>Male</b>    | 8      | 7      | 1211   | 931    | 136    | 91     | 59     | 0   | 0  |
| <b>10-19</b>   | <b>Unknown</b> | 3      | 3      | 1422   | 1017   | 8      | 7      | 87     | 0   | 0  |
| <b>20-29</b>   | <b>Unknown</b> | 32     | 32     | 1079   | 706    | 48     | 45     | 595    | 2   | 0  |
| <b>30-39</b>   | <b>Unknown</b> | 35     | 34     | 1195   | 893    | 76     | 67     | 679    | 1   | 0  |
| <b>40-49</b>   | <b>Unknown</b> | 48     | 46     | 1496   | 1285   | 166    | 155    | 591    | 3   | 0  |
| <b>50-59</b>   | <b>Unknown</b> | 94     | 93     | 2540   | 2385   | 346    | 333    | 727    | 0   | 0  |
| <b>60-69</b>   | <b>Unknown</b> | 63     | 56     | 1549   | 1457   | 46     | 42     | 114    | 3   | 0  |
| <b>70-79</b>   | <b>Unknown</b> | 1      | 0      | 4064   | 3963   | 13     | 12     | 29     | 1   | 0  |
| <b>80-89</b>   | <b>Unknown</b> | 1      | 1      | 1392   | 1357   | 3      | 3      | 8      | 0   | 0  |
| <b>90-99</b>   | <b>Unknown</b> | 0      | 0      | 176    | 175    | 0      | 0      | 1      | 0   | 0  |
| <b>100-109</b> | <b>Unknown</b> | 0      | 0      | 2      | 1      | 0      | 0      | 0      | 0   | 0  |
| <b>110-119</b> | <b>Unknown</b> | 0      | 0      | 0      | 0      | 0      | 0      | 0      | 0   | 0  |
| <b>unknown</b> | <b>Unknown</b> | 30     | 16     | 411    | 223    | 33     | 13     | 36     | 4   | 0  |

- The Municipal Public Health Service (GGD) or a vaccinated person's General Practitioner will only share a person's data with RIVM if this person gives consent for it to be shared. We have data from CIMS, separately for age and sex.
- Numbers for AstraZeneca may not be entirely complete due to a lag in registration

[1] The National Institute for Public Health and the Environment (RIVM). The COVID-19 vaccination Information and Monitoring System (CIMS). Data provided by the RIVM.
