# Supplementary material
Source: PubMed Central journal article supplement (PMC8936041)
Supplement: 40264_2022_1151_MOESM2_ESM.pdf [file 40264_2022_1151_MOESM2_ESM.pdf]

### Electronic Supplemental material 3 – all reported AEFI per vaccine brand

#### Description of frequencies of reported adverse events following immunization among four different COVID-19 vaccine brands

Drug Safety – Original Research

#### Author information

Agnes Kant<sup>1</sup>, Jurriaan Jansen<sup>1</sup>, Leontine van Balveren<sup>1</sup>, Florence van Hunsel<sup>1</sup>

#### Affiliations

<sup>1</sup> Netherlands Pharmacovigilance Centre Lareb, 's Hertogenbosch, the Netherlands.

Correspondence: f.vanhunsel@lareb.nl

**Table 1. Number of reported AEFI per vaccine brand**

| REPORTED AEFI (MEDDRA PREFERRED TERM) | ASTRAZENECA | PFIZER | MODERNA | JANSSEN |
|---------------------------------------|-------------|--------|---------|---------|
| INJECTION SITE PAIN                   | 5585        | 4610   | 2808    | 839     |
| FATIGUE                               | 6674        | 3474   | 2332    | 1292    |
| MYALGIA                               | 5762        | 3304   | 2253    | 1061    |
| HEADACHE                              | 6877        | 2364   | 1867    | 1277    |
| MALaise                               | 6428        | 2406   | 2139    | 1202    |
| CHILLS                                | 5371        | 969    | 1268    | 932     |
| PYREXIA                               | 3258        | 421    | 776     | 540     |
| ARTHRALGIA                            | 2875        | 862    | 713     | 494     |
| NAUSEA                                | 2677        | 837    | 848     | 495     |
| INJECTION SITE INFLAMMATION           | 2122        | 942    | 1268    | 264     |
| INJECTION SITE SWELLING               | 1888        | 872    | 1082    | 268     |
| INJECTION SITE WARMTH                 | 1353        | 622    | 978     | 151     |
| INJECTION SITE ERYTHEMA               | 923         | 393    | 728     | 97      |
| INJECTION SITE HAEMATOMA              | 613         | 340    | 301     | 112     |
| FEVER                                 | 720         | 115    | 274     | 220     |
| BODY TEMPERATURE INCREASED            | 613         | 203    | 264     | 132     |
| INJECTION SITE PRURITUS               | 412         | 203    | 312     | 43      |
| INJECTION SITE DISCOMFORT             | 244         | 353    | 131     | 44      |
| DIZZINESS                             | 320         | 205    | 77      | 50      |
| PAIN IN EXTREMITY                     | 196         | 134    | 54      | 19      |
| DIARRHOEA                             | 141         | 153    | 61      | 35      |
| INJECTION SITE INDURATION             | 104         | 54     | 99      | 8       |
| DYSPNOEA                              | 122         | 63     | 40      | 27      |
| LYMPHADENOPATHY                       | 84          | 57     | 85      | 19      |
| EXTENSIVE SWELLING OF VACCINATED LIMB | 103         | 40     | 84      | 12      |
| NASOPHARYNGITIS                       | 95          | 70     | 24      | 17      |
| OROPHARYNGEAL PAIN                    | 100         | 60     | 26      | 18      |
| PALPITATIONS                          | 106         | 48     | 32      | 17      |
| PARAESTHESIA                          | 91          | 58     | 24      | 29      |
| LIMB DISCOMFORT                       | 80          | 39     | 22      | 22      |
| ABDOMINAL PAIN                        | 80          | 49     | 17      | 14      |
| VOMITING                              | 72          | 19     | 22      | 10      |
| HYPERHIDROSIS                         | 59          | 31     | 24      | 7       |
| PRURITUS                              | 47          | 49     | 16      | 5       |

|                                  |    |    |    |    |
|----------------------------------|----|----|----|----|
| COUGH                            | 65 | 27 | 13 | 9  |
| CHEST PAIN                       | 55 | 34 | 12 | 11 |
| BACK PAIN                        | 59 | 24 | 11 | 15 |
| HYPERPYREXIA                     | 81 | 2  | 6  | 12 |
| HEART RATE INCREASED             | 56 | 26 | 9  | 7  |
| RASH                             | 45 | 34 | 10 | 7  |
| INJECTED LIMB MOBILITY DECREASED | 33 | 27 | 28 | 2  |
| HOT FLUSH                        | 35 | 20 | 14 | 7  |
| MUSCLE SPASMS                    | 39 | 19 | 14 | 4  |
| CHEST DISCOMFORT                 | 42 | 20 | 7  | 6  |
| ABDOMINAL DISCOMFORT             | 30 | 24 | 12 | 8  |
| FEELING ABNORMAL                 | 28 | 18 | 13 | 10 |
| DISTURBANCE IN ATTENTION         | 32 | 23 | 7  | 4  |
| DECREASED APPETITE               | 41 | 12 | 4  | 6  |
| DYSGEUSIA                        | 28 | 18 | 8  | 7  |
| SYNCOPE                          | 25 | 19 | 9  | 8  |
| MUSCULOSKELETAL STIFFNESS        | 24 | 24 | 8  | 4  |
| FEELING HOT                      | 27 | 15 | 12 | 3  |
| TINNITUS                         | 22 | 19 | 7  | 8  |
| EPISTAXIS                        | 19 | 22 | 8  | 5  |
| NECK PAIN                        | 27 | 18 | 7  | 2  |
| RHINORRHOEA                      | 17 | 33 | 1  | 2  |
| SARS-COV-2 TEST POSITIVE         | 40 | 8  | 1  | 4  |
| RASH PRURITIC                    | 21 | 19 | 11 | 1  |
| SOMNOLENCE                       | 14 | 32 | 4  | 2  |
| ERYTHEMA                         | 20 | 20 | 8  | 2  |
| VISION BLURRED                   | 25 | 15 | 8  | 2  |
| HYPOAESTHESIA                    | 18 | 20 | 6  | 5  |
| MUSCULAR WEAKNESS                | 19 | 21 | 4  | 5  |
| PARAESTHESIA ORAL                | 20 | 15 | 9  | 5  |
| PRESYNCOPE                       | 25 | 14 | 8  | 2  |
| NIGHT SWEATS                     | 26 | 6  | 7  | 8  |
| HAEMATOMA                        | 31 | 9  | 1  | 5  |
| EAR PAIN                         | 29 | 10 | 4  | 2  |
| PAIN                             | 19 | 15 | 5  | 6  |
| PAIN OF SKIN                     | 26 | 3  | 8  | 8  |
| INFLUENZA LIKE ILLNESS           | 17 | 17 | 6  | 3  |
| ABDOMINAL PAIN UPPER             | 24 | 7  | 5  | 6  |
| HEAD DISCOMFORT                  | 22 | 11 | 4  | 4  |
| HEAVY MENSTRUAL BLEEDING         | 16 | 11 | 4  | 8  |
| CONDITION AGGRAVATED             | 12 | 17 | 5  | 4  |
| BLOOD PRESSURE INCREASED         | 14 | 15 | 4  | 4  |
| INSOMNIA                         | 19 | 7  | 9  | 2  |
| EYE PAIN                         | 22 | 7  | 3  | 4  |
| MIGRAINE                         | 23 | 4  | 7  | 2  |
| DRY MOUTH                        | 17 | 7  | 5  | 4  |
| FEELING COLD                     | 18 | 7  | 4  | 4  |
| ASTHENIA                         | 17 | 12 | 1  | 2  |

|                                 |    |    |    |   |
|---------------------------------|----|----|----|---|
| DYSPNOEA EXERTIONAL             | 16 | 9  | 5  | 2 |
| ORAL HERPES                     | 16 | 15 | 0  | 1 |
| POOR QUALITY SLEEP              | 17 | 5  | 5  | 4 |
| AXILLARY PAIN                   | 14 | 5  | 11 | 1 |
| INJECTION SITE REACTION         | 7  | 19 | 3  | 1 |
| MENSTRUATION IRREGULAR          | 7  | 8  | 9  | 4 |
| TASTE DISORDER                  | 9  | 12 | 2  | 3 |
| PERIPHERAL SWELLING             | 13 | 7  | 3  | 2 |
| THIRST                          | 16 | 0  | 1  | 8 |
| PAROSMIA                        | 10 | 7  | 5  | 2 |
| URTICARIA                       | 9  | 10 | 4  | 1 |
| PERIPHERAL COLDNESS             | 17 | 4  | 0  | 2 |
| PETECHIAE                       | 13 | 6  | 2  | 2 |
| BURNING SENSATION               | 14 | 6  | 2  | 0 |
| DEPRESSED MOOD                  | 15 | 5  | 2  | 0 |
| AGEUSIA                         | 7  | 11 | 0  | 3 |
| CONFUSIONAL STATE               | 9  | 3  | 5  | 3 |
| COVID-19                        | 17 | 3  | 0  | 1 |
| SENSITIVE SKIN                  | 14 | 2  | 2  | 3 |
| SWOLLEN TONGUE                  | 9  | 8  | 3  | 1 |
| HERPES ZOSTER                   | 5  | 12 | 2  | 1 |
| INTERMENSTRUAL BLEEDING         | 6  | 11 | 1  | 2 |
| MENSTRUATION DELAYED            | 4  | 7  | 5  | 4 |
| OCULAR DISCOMFORT               | 12 | 4  | 1  | 3 |
| RESTLESSNESS                    | 8  | 9  | 1  | 2 |
| TOOTHACHE                       | 9  | 6  | 4  | 1 |
| INJECTION SITE PARAESTHESIA     | 5  | 6  | 6  | 2 |
| LISTLESS                        | 3  | 12 | 1  | 3 |
| MEMORY IMPAIRMENT               | 10 | 5  | 3  | 1 |
| NASAL CONGESTION                | 13 | 2  | 2  | 2 |
| OEDEMA PERIPHERAL               | 9  | 3  | 5  | 2 |
| RASH ERYTHEMATOUS               | 6  | 7  | 3  | 3 |
| VISUAL IMPAIRMENT               | 7  | 10 | 0  | 2 |
| BALANCE DISORDER                | 4  | 12 | 1  | 1 |
| HYPERSENSITIVITY                | 9  | 8  | 1  | 0 |
| NEURALGIA                       | 15 | 3  | 0  | 0 |
| PAIN IN JAW                     | 9  | 3  | 2  | 4 |
| PULMONARY PAIN                  | 13 | 3  | 0  | 2 |
| THERAPEUTIC RESPONSE UNEXPECTED | 6  | 5  | 5  | 1 |
| ABDOMINAL PAIN LOWER            | 8  | 8  | 1  | 0 |
| ANXIETY                         | 14 | 1  | 0  | 2 |
| ECZEMA                          | 9  | 5  | 3  | 0 |
| EYE IRRITATION                  | 13 | 3  | 0  | 1 |
| RESTLESS LEGS SYNDROME          | 12 | 2  | 1  | 2 |
| SNEEZING                        | 4  | 11 | 0  | 2 |
| ABNORMAL DREAMS                 | 3  | 10 | 1  | 2 |
| CONSTIPATION                    | 6  | 8  | 1  | 1 |
| MUSCULOSKELETAL DISCOMFORT      | 10 | 3  | 3  | 0 |

|                                          |    |   |   |   |
|------------------------------------------|----|---|---|---|
| TREMOR                                   | 5  | 6 | 1 | 4 |
| APHTHOUS ULCER                           | 12 | 2 | 0 | 1 |
| DYSPEPSIA                                | 12 | 1 | 2 | 0 |
| DYSPHONIA                                | 9  | 4 | 1 | 1 |
| GENERAL PHYSICAL HEALTH DETERIORATION    | 8  | 5 | 1 | 1 |
| MENSTRUAL DISORDER                       | 2  | 6 | 4 | 3 |
| VERTIGO                                  | 7  | 3 | 4 | 1 |
| ABDOMINAL DISTENSION                     | 8  | 3 | 2 | 1 |
| ARRHYTHMIA                               | 6  | 7 | 1 | 0 |
| DISCOMFORT                               | 2  | 8 | 2 | 2 |
| PHOTOPHOBIA                              | 9  | 3 | 1 | 1 |
| PRODUCTIVE COUGH                         | 8  | 5 | 0 | 1 |
| TACHYCARDIA                              | 8  | 1 | 4 | 1 |
| GASTROINTESTINAL PAIN                    | 7  | 4 | 2 | 0 |
| HYPOTENSION                              | 4  | 5 | 2 | 2 |
| LIP SWELLING                             | 5  | 8 | 0 | 0 |
| MUSCLE TWITCHING                         | 4  | 6 | 1 | 2 |
| NEUROPATHY PERIPHERAL                    | 7  | 3 | 1 | 2 |
| ASTHMA                                   | 6  | 3 | 2 | 1 |
| POLYMENORRHOEA                           | 1  | 5 | 3 | 3 |
| RASH PAPULAR                             | 7  | 3 | 1 | 1 |
| VAGINAL HAEMORRHAGE                      | 4  | 4 | 2 | 2 |
| AMENORRHOEA                              | 4  | 4 | 0 | 3 |
| ATRIAL FIBRILLATION                      | 4  | 6 | 1 | 0 |
| CYSTITIS                                 | 6  | 4 | 0 | 1 |
| GAIT DISTURBANCE                         | 5  | 3 | 2 | 1 |
| HYPERTENSION                             | 5  | 6 | 0 | 0 |
| HYPOAESTHESIA ORAL                       | 6  | 2 | 1 | 2 |
| INJECTION SITE RASH                      | 2  | 2 | 7 | 0 |
| PHARYNGEAL SWELLING                      | 2  | 6 | 3 | 0 |
| ANOSMIA                                  | 2  | 4 | 3 | 1 |
| DRY THROAT                               | 3  | 6 | 0 | 1 |
| FEELING OF BODY TEMPERATURE CHANGE       | 6  | 1 | 1 | 2 |
| HEART RATE IRREGULAR                     | 2  | 6 | 1 | 1 |
| SKIN DISCOLOURATION                      | 6  | 4 | 0 | 0 |
| BLOOD GLUCOSE INCREASED                  | 2  | 6 | 1 | 0 |
| BREAST PAIN                              | 3  | 4 | 1 | 1 |
| DIZZINESS POSTURAL                       | 5  | 3 | 1 | 0 |
| FLANK PAIN                               | 2  | 4 | 3 | 0 |
| INTERNATIONAL NORMALISED RATIO INCREASED | 0  | 9 | 0 | 0 |
| OROPHARYNGEAL DISCOMFORT                 | 3  | 5 | 0 | 1 |
| PAPULE                                   | 1  | 3 | 4 | 1 |
| SEASONAL ALLERGY                         | 2  | 5 | 1 | 1 |
| SLEEP DISORDER                           | 3  | 5 | 1 | 0 |
| ACNE                                     | 3  | 4 | 1 | 0 |
| CARDIAC DISCOMFORT                       | 2  | 5 | 1 | 0 |
| DIZZINESS EXERTIONAL                     | 4  | 1 | 2 | 1 |

|                                                       |   |   |   |   |
|-------------------------------------------------------|---|---|---|---|
| FEELING DRUNK                                         | 4 | 1 | 1 | 2 |
| GROIN PAIN                                            | 3 | 3 | 2 | 0 |
| LACRIMATION INCREASED                                 | 2 | 4 | 1 | 1 |
| MIGRAINE WITH AURA                                    | 3 | 1 | 3 | 1 |
| NIGHTMARE                                             | 5 | 1 | 2 | 0 |
| SINUSITIS                                             | 3 | 2 | 1 | 2 |
| SWELLING                                              | 1 | 5 | 1 | 1 |
| AFFECT LABILITY                                       | 5 | 1 | 0 | 1 |
| ALOPECIA                                              | 1 | 3 | 1 | 2 |
| BODY TEMPERATURE DECREASED                            | 5 | 1 | 0 | 1 |
| BONE PAIN                                             | 6 | 0 | 0 | 0 |
| DRY EYE                                               | 3 | 2 | 1 | 1 |
| EXERCISE TOLERANCE DECREASED                          | 2 | 2 | 1 | 2 |
| FLUSHING                                              | 2 | 3 | 2 | 0 |
| FREQUENT BOWEL MOVEMENTS                              | 2 | 2 | 1 | 2 |
| GINGIVAL PAIN                                         | 3 | 0 | 2 | 2 |
| IRRITABILITY                                          | 2 | 3 | 2 | 0 |
| OPHTHALMIC MIGRAINE                                   | 6 | 0 | 1 | 0 |
| OXYGEN SATURATION DECREASED                           | 3 | 2 | 1 | 1 |
| POLYURIA                                              | 5 | 1 | 1 | 0 |
| SWELLING FACE                                         | 3 | 2 | 2 | 0 |
| ABNORMAL FAECES                                       | 2 | 4 | 0 | 0 |
| ARTHRITIS                                             | 2 | 1 | 2 | 1 |
| BLOOD PRESSURE DECREASED                              | 3 | 3 | 0 | 0 |
| CONTUSION                                             | 3 | 1 | 1 | 1 |
| EAR DISCOMFORT                                        | 2 | 3 | 1 | 0 |
| EYE HAEMORRHAGE                                       | 4 | 2 | 0 | 0 |
| EYE INFLAMMATION                                      | 2 | 3 | 1 | 0 |
| FLATULENCE                                            | 1 | 4 | 1 | 0 |
| HYPERAESTHESIA                                        | 4 | 0 | 0 | 2 |
| INCREASED VISCOSITY OF UPPER<br>RESPIRATORY SECRETION | 2 | 3 | 1 | 0 |
| JOINT SWELLING                                        | 2 | 2 | 2 | 0 |
| MUSCLE DISCOMFORT                                     | 2 | 0 | 2 | 2 |
| NASAL DISCOMFORT                                      | 1 | 2 | 3 | 0 |
| PSORIASIS                                             | 3 | 2 | 1 | 0 |
| RASH MACULAR                                          | 3 | 1 | 2 | 0 |
| RESPIRATORY TRACT IRRITATION                          | 3 | 2 | 0 | 1 |
| THROAT IRRITATION                                     | 3 | 3 | 0 | 0 |
| THROAT TIGHTNESS                                      | 1 | 2 | 3 | 0 |
| APHASIA                                               | 1 | 4 | 0 | 0 |
| ASTHENOPIA                                            | 1 | 2 | 2 | 0 |
| BLEPHARITIS                                           | 2 | 2 | 1 | 0 |
| BLEPHAROSPASM                                         | 2 | 1 | 1 | 1 |
| BLOOD GLUCOSE FLUCTUATION                             | 3 | 1 | 1 | 0 |
| BURSITIS                                              | 2 | 2 | 1 | 0 |
| DISORIENTATION                                        | 1 | 3 | 0 | 1 |
| DRY SKIN                                              | 3 | 0 | 1 | 1 |

|                                       |   |   |   |   |
|---------------------------------------|---|---|---|---|
| DYSMENORRHOEA                         | 1 | 3 | 1 | 0 |
| EPILEPSY                              | 2 | 1 | 2 | 0 |
| ERYSIPELAS                            | 3 | 1 | 1 | 0 |
| EYE SWELLING                          | 1 | 3 | 0 | 1 |
| FACIAL PAIN                           | 1 | 3 | 0 | 1 |
| FAECES SOFT                           | 2 | 1 | 2 | 0 |
| FALL                                  | 1 | 3 | 1 | 0 |
| HUNGER                                | 0 | 3 | 1 | 1 |
| HYPOGLYCAEMIA                         | 3 | 0 | 2 | 0 |
| INCREASED TENDENCY TO BRUISE          | 2 | 0 | 0 | 3 |
| MUSCULOSKELETAL CHEST PAIN            | 2 | 3 | 0 | 0 |
| OLIGOMENORRHOEA                       | 0 | 3 | 1 | 1 |
| ORAL DISCOMFORT                       | 1 | 4 | 0 | 0 |
| RENAL PAIN                            | 5 | 0 | 0 | 0 |
| RHINITIS                              | 1 | 4 | 0 | 0 |
| URINE ODOUR ABNORMAL                  | 2 | 2 | 1 | 0 |
| VAGINAL DISCHARGE                     | 3 | 2 | 0 | 0 |
| APHONIA                               | 1 | 1 | 1 | 1 |
| BLEEDING TIME PROLONGED               | 3 | 1 | 0 | 0 |
| BODY TEMPERATURE FLUCTUATION          | 1 | 1 | 0 | 1 |
| CHRONIC OBSTRUCTIVE PULMONARY DISEASE | 1 | 3 | 0 | 0 |
| CRYING                                | 2 | 0 | 1 | 1 |
| DEPRESSION                            | 3 | 0 | 1 | 0 |
| DIPLOPIA                              | 2 | 2 | 0 | 0 |
| DYSURIA                               | 1 | 1 | 2 | 0 |
| EAR INFECTION                         | 1 | 1 | 1 | 1 |
| FLUID RETENTION                       | 2 | 1 | 0 | 1 |
| GINGIVAL DISCOMFORT                   | 2 | 1 | 1 | 0 |
| GOITRE                                | 2 | 1 | 0 | 1 |
| HYPERACUSIS                           | 2 | 1 | 1 | 0 |
| HYPERVENTILATION                      | 1 | 1 | 1 | 1 |
| INFLAMMATION                          | 2 | 1 | 1 | 0 |
| INJECTION SITE DISCOLOURATION         | 0 | 3 | 1 | 0 |
| INJECTION SITE HYPOAESTHESIA          | 0 | 1 | 2 | 1 |
| LYMPH NODE PAIN                       | 2 | 2 | 0 | 0 |
| MUSCULOSKELETAL PAIN                  | 2 | 0 | 1 | 1 |
| ODYNOPHAGIA                           | 2 | 2 | 0 | 0 |
| ORAL MUCOSAL BLISTERING               | 2 | 1 | 0 | 1 |
| ORAL PAIN                             | 3 | 0 | 0 | 1 |
| PARANASAL SINUS DISCOMFORT            | 4 | 0 | 0 | 0 |
| PHLEBITIS                             | 3 | 1 | 0 | 0 |
| POLLAKIURIA                           | 0 | 3 | 0 | 1 |
| RESPIRATORY TRACT INFECTION           | 3 | 0 | 1 | 0 |
| SKIN EXFOLIATION                      | 1 | 1 | 2 | 0 |
| SLOW RESPONSE TO STIMULI              | 2 | 1 | 0 | 1 |
| TONGUE DISCOMFORT                     | 2 | 2 | 0 | 0 |
| VASCULAR PAIN                         | 3 | 1 | 0 | 0 |

|                                          |   |   |   |   |
|------------------------------------------|---|---|---|---|
| YAWNING                                  | 2 | 1 | 1 | 0 |
| ABORTION SPONTANEOUS                     | 0 | 1 | 1 | 1 |
| AMNESIA                                  | 0 | 1 | 1 | 1 |
| BLOOD PRESSURE FLUCTUATION               | 2 | 1 | 0 | 0 |
| BRADYPHRENIA                             | 2 | 0 | 1 | 0 |
| BREAST DISCOMFORT                        | 1 | 0 | 2 | 0 |
| BRONCHITIS                               | 1 | 2 | 0 | 0 |
| CEREBRAL INFARCTION                      | 1 | 1 | 1 | 0 |
| CHILLBLAINS                              | 1 | 1 | 0 | 1 |
| COLD SWEAT                               | 1 | 2 | 0 | 0 |
| CONJUNCTIVAL HAEMORRHAGE                 | 1 | 2 | 0 | 0 |
| DEAFNESS UNILATERAL                      | 2 | 1 | 0 | 0 |
| DERMATITIS ALLERGIC                      | 2 | 1 | 0 | 0 |
| DYSKINESIA                               | 2 | 1 | 0 | 0 |
| DYSPHAGIA                                | 0 | 2 | 0 | 1 |
| ECCHYMOSIS                               | 1 | 2 | 0 | 0 |
| EXTRASYSTOLES                            | 2 | 1 | 0 | 0 |
| EYE PRURITUS                             | 1 | 1 | 0 | 1 |
| EYELID INFECTION                         | 2 | 0 | 0 | 1 |
| FEELING JITTERY                          | 0 | 1 | 2 | 0 |
| FEVERISH                                 | 1 | 2 | 0 | 0 |
| FIBROMYALGIA                             | 1 | 2 | 0 | 0 |
| GINGIVAL BLEEDING                        | 2 | 0 | 1 | 0 |
| GOUT                                     | 1 | 1 | 1 | 0 |
| HAEMATURIA                               | 0 | 1 | 2 | 0 |
| HEART RATE DECREASED                     | 0 | 2 | 0 | 1 |
| HYPERAESTHESIA TEETH                     | 1 | 1 | 1 | 0 |
| HYPOGEUSIA                               | 1 | 1 | 1 | 0 |
| INCREASED APPETITE                       | 0 | 1 | 1 | 1 |
| INITIAL INSOMNIA                         | 3 | 0 | 0 | 0 |
| INJECTION SITE HAEMORRHAGE               | 1 | 1 | 1 | 0 |
| INJECTION SITE URTICARIA                 | 1 | 1 | 0 | 1 |
| INTERNATIONAL NORMALISED RATIO DECREASED | 1 | 2 | 0 | 0 |
| LARYNGITIS                               | 1 | 0 | 2 | 0 |
| MENTAL IMPAIRMENT                        | 2 | 1 | 0 | 0 |
| MOBILITY DECREASED                       | 1 | 2 | 0 | 0 |
| MOOD ALTERED                             | 1 | 1 | 1 | 0 |
| MOOD SWINGS                              | 1 | 2 | 0 | 0 |
| NO ADVERSE EVENT                         | 3 | 0 | 0 | 0 |
| OCULAR HYPERAEMIA                        | 3 | 0 | 0 | 0 |
| ORAL MUCOSAL ERYTHEMA                    | 0 | 3 | 0 | 0 |
| PAINFUL RESPIRATION                      | 3 | 0 | 0 | 0 |
| PALLOR                                   | 1 | 1 | 0 | 1 |
| PANIC ATTACK                             | 0 | 2 | 0 | 1 |
| PHOTOPSIA                                | 2 | 1 | 0 | 0 |
| PNEUMONIA                                | 1 | 1 | 1 | 0 |
| POSTMENOPAUSAL HAEMORRHAGE               | 1 | 2 | 0 | 0 |

|                                  |   |   |   |   |
|----------------------------------|---|---|---|---|
| PULPITIS DENTAL                  | 2 | 0 | 1 | 0 |
| SINUS CONGESTION                 | 3 | 0 | 0 | 0 |
| SKIN BURNING SENSATION           | 1 | 0 | 2 | 0 |
| SKIN DISCOMFORT                  | 2 | 1 | 0 | 0 |
| SKIN REACTION                    | 2 | 0 | 1 | 0 |
| SPONTANEOUS HAEMATOMA            | 1 | 1 | 1 | 0 |
| SWELLING OF EYELID               | 0 | 2 | 1 | 0 |
| TENSION                          | 2 | 1 | 0 | 0 |
| TONSILLAR HYPERTROPHY            | 1 | 1 | 0 | 1 |
| TRANSIENT ISCHAEMIC ATTACK       | 0 | 3 | 0 | 0 |
| URINARY INCONTINENCE             | 0 | 3 | 0 | 0 |
| VARICOSE VEIN                    | 2 | 1 | 0 | 0 |
| VASODILATATION                   | 2 | 1 | 0 | 0 |
| VENTRICULAR EXTRASYSTOLES        | 0 | 2 | 1 | 0 |
| VERTIGO POSITIONAL               | 3 | 0 | 0 | 0 |
| ABNORMAL SENSATION IN EYE        | 1 | 1 | 0 | 0 |
| ANGER                            | 0 | 1 | 0 | 1 |
| BLOOD URINE PRESENT              | 0 | 2 | 0 | 0 |
| BOWEL MOVEMENT IRREGULARITY      | 1 | 1 | 0 | 0 |
| BREAST SWELLING                  | 1 | 1 | 0 | 0 |
| BREAST TENDERNESS                | 0 | 1 | 0 | 1 |
| BRONCHIAL SECRETION RETENTION    | 1 | 1 | 0 | 0 |
| CHEILITIS                        | 0 | 2 | 0 | 0 |
| CHROMATURIA                      | 1 | 1 | 0 | 0 |
| CLUSTER HEADACHE                 | 1 | 1 | 0 | 0 |
| COORDINATION ABNORMAL            | 2 | 0 | 0 | 0 |
| DECREASED IMMUNE RESPONSIVENESS  | 2 | 0 | 0 | 0 |
| DIAPHRAGMALGIA                   | 0 | 2 | 0 | 0 |
| DIVERTICULITIS                   | 0 | 2 | 0 | 0 |
| EMOTIONAL DISORDER               | 1 | 1 | 0 | 0 |
| ERECTILE DYSFUNCTION             | 0 | 2 | 0 | 0 |
| EXERTIONAL HEADACHE              | 1 | 0 | 1 | 0 |
| EXPOSURE VIA BREAST MILK         | 1 | 1 | 0 | 0 |
| EYE INFECTION                    | 1 | 1 | 0 | 0 |
| EYELID OEDEMA                    | 2 | 0 | 0 | 0 |
| FACIAL DISCOMFORT                | 1 | 1 | 0 | 0 |
| FACIAL PARALYSIS                 | 1 | 0 | 1 | 0 |
| FEAR                             | 1 | 0 | 1 | 0 |
| FIBRIN D DIMER INCREASED         | 2 | 0 | 0 | 0 |
| FURUNCLE                         | 0 | 2 | 0 | 0 |
| GASTROOESOPHAGEAL REFLUX DISEASE | 2 | 0 | 0 | 0 |
| GENITAL RASH                     | 1 | 1 | 0 | 0 |
| GINGIVITIS                       | 1 | 0 | 1 | 0 |
| GLOSSODYNIA                      | 1 | 1 | 0 | 0 |
| HAEMORRHOIDS                     | 2 | 0 | 0 | 0 |
| HALLUCINATION                    | 2 | 0 | 0 | 0 |
| HEART RATE ABNORMAL              | 1 | 1 | 0 | 0 |
| HEMIPARAESTHESIA                 | 0 | 1 | 1 | 0 |



|                                          |   |   |   |   |
|------------------------------------------|---|---|---|---|
| <b>HYPERRESPONSIVE TO STIMULI</b>        | 1 | 1 | 0 | 0 |
| <b>HYPERSOMNIA</b>                       | 1 | 0 | 1 | 0 |
| <b>HYPOACUSIS</b>                        | 1 | 1 | 0 | 0 |
| <b>HYPOSMIA</b>                          | 2 | 0 | 0 | 0 |
| <b>HYPOTHERMIA</b>                       | 1 | 0 | 0 | 1 |
| <b>INFLUENZA</b>                         | 0 | 2 | 0 | 0 |
| <b>INJECTION SITE BRUISING</b>           | 2 | 0 | 0 | 0 |
| <b>INJECTION SITE CELLULITIS</b>         | 2 | 0 | 0 | 0 |
| <b>INJECTION SITE DRYNESS</b>            | 1 | 1 | 0 | 0 |
| <b>INJECTION SITE ECZEMA</b>             | 2 | 0 | 0 | 0 |
| <b>INJECTION SITE IRRITATION</b>         | 0 | 2 | 0 | 0 |
| <b>INJECTION SITE PAPULE</b>             | 1 | 1 | 0 | 0 |
| <b>JOINT NOISE</b>                       | 1 | 1 | 0 | 0 |
| <b>LACTATION DISORDER</b>                | 0 | 2 | 0 | 0 |
| <b>LIBIDO DECREASED</b>                  | 0 | 2 | 0 | 0 |
| <b>LIP DRY</b>                           | 1 | 1 | 0 | 0 |
| <b>LOCALISED INFECTION</b>               | 2 | 0 | 0 | 0 |
| <b>LOCALISED OEDEMA</b>                  | 1 | 1 | 0 | 0 |
| <b>LOSS OF CONSCIOUSNESS</b>             | 0 | 1 | 1 | 0 |
| <b>MENOPAUSAL SYMPTOMS</b>               | 2 | 0 | 0 | 0 |
| <b>MENOPAUSE DELAYED</b>                 | 2 | 0 | 0 | 0 |
| <b>MOUTH SWELLING</b>                    | 1 | 0 | 0 | 1 |
| <b>MOUTH ULCERATION</b>                  | 1 | 0 | 1 | 0 |
| <b>MUCOUS STOOLS</b>                     | 1 | 0 | 1 | 0 |
| <b>MUSCLE CONTRACTIONS INVOLUNTARY</b>   | 1 | 0 | 0 | 1 |
| <b>MUSCLE TIGHTNESS</b>                  | 2 | 0 | 0 | 0 |
| <b>MYOCARDIAL INFARCTION</b>             | 0 | 2 | 0 | 0 |
| <b>NOCTURIA</b>                          | 1 | 0 | 0 | 0 |
| <b>NODULE</b>                            | 2 | 0 | 0 | 0 |
| <b>NONINFECTIVE GINGIVITIS</b>           | 2 | 0 | 0 | 0 |
| <b>OEDEMA MUCOSAL</b>                    | 1 | 0 | 1 | 0 |
| <b>OESOPHAGEAL PAIN</b>                  | 1 | 1 | 0 | 0 |
| <b>ORAL LICHEN PLANUS</b>                | 0 | 1 | 1 | 0 |
| <b>OROPHARYNGEAL SWELLING</b>            | 0 | 1 | 0 | 1 |
| <b>OTITIS MEDIA</b>                      | 1 | 0 | 0 | 1 |
| <b>OXYGEN SATURATION INCREASED</b>       | 0 | 2 | 0 | 0 |
| <b>PARANASAL SINUS INFLAMMATION</b>      | 0 | 1 | 1 | 0 |
| <b>PERIORBITAL SWELLING</b>              | 1 | 1 | 0 | 0 |
| <b>PLEURITIC PAIN</b>                    | 2 | 0 | 0 | 0 |
| <b>PRODUCT ADMINISTRATION ERROR</b>      | 1 | 0 | 0 | 1 |
| <b>PROTEINURIA</b>                       | 0 | 2 | 0 | 0 |
| <b>PSYCHOMOTOR HYPERACTIVITY</b>         | 1 | 0 | 1 | 0 |
| <b>PULMONARY EMBOLISM</b>                | 2 | 0 | 0 | 0 |
| <b>PULMONARY FUNCTION TEST DECREASED</b> | 1 | 0 | 0 | 1 |
| <b>PYELONEPHRITIS</b>                    | 2 | 0 | 0 | 0 |
| <b>RAYNAUD'S PHENOMENON</b>              | 2 | 0 | 0 | 0 |
| <b>RETCHING</b>                          | 1 | 0 | 0 | 1 |
| <b>ROTATOR CUFF SYNDROME</b>             | 0 | 2 | 0 | 0 |

|                                                |   |   |   |   |
|------------------------------------------------|---|---|---|---|
| <b>SALIVARY HYPERSECRETION</b>                 | 1 | 0 | 1 | 0 |
| <b>SARS-COV-2 TEST NEGATIVE</b>                | 1 | 1 | 0 | 0 |
| <b>SECRETION DISCHARGE</b>                     | 1 | 0 | 0 | 1 |
| <b>SENSATION OF FOREIGN BODY</b>               | 2 | 0 | 0 | 0 |
| <b>SENSORY OVERLOAD</b>                        | 2 | 0 | 0 | 0 |
| <b>SINUS PAIN</b>                              | 1 | 0 | 0 | 1 |
| <b>SKIN IRRITATION</b>                         | 2 | 0 | 0 | 0 |
| <b>SKIN ODOUR ABNORMAL</b>                     | 0 | 1 | 1 | 0 |
| <b>SKIN SENSITISATION</b>                      | 0 | 1 | 1 | 0 |
| <b>SUSPECTED COVID-19</b>                      | 1 | 1 | 0 | 0 |
| <b>TENSION HEADACHE</b>                        | 0 | 2 | 0 | 0 |
| <b>TONGUE BLISTERING</b>                       | 0 | 1 | 1 | 0 |
| <b>TONGUE COATED</b>                           | 2 | 0 | 0 | 0 |
| <b>TONGUE DISCOLOURATION</b>                   | 0 | 0 | 0 | 2 |
| <b>TRANSIENT GLOBAL AMNESIA</b>                | 1 | 1 | 0 | 0 |
| <b>TRIGEMINAL NEURALGIA</b>                    | 2 | 0 | 0 | 0 |
| <b>UPPER RESPIRATORY TRACT INFECTION</b>       | 1 | 0 | 1 | 0 |
| <b>VISUAL FIELD DEFECT</b>                     | 0 | 2 | 0 | 0 |
| <b>VITREOUS FLOATERS</b>                       | 2 | 0 | 0 | 0 |
| <b>VULVOVAGINAL CANDIDIASIS</b>                | 1 | 1 | 0 | 0 |
| <b>WEIGHT INCREASED</b>                        | 2 | 0 | 0 | 0 |
| <b>ABDOMINAL LYMPHADENOPATHY</b>               | 1 | 0 | 0 | 0 |
| <b>ABORTION MISSED</b>                         | 1 | 0 | 0 | 0 |
| <b>ABSCESS ORAL</b>                            | 1 | 0 | 0 | 0 |
| <b>ACUTE LUNG INJURY</b>                       | 1 | 0 | 0 | 0 |
| <b>ACUTE MYOCARDIAL INFARCTION</b>             | 1 | 0 | 0 | 0 |
| <b>ACUTE SINUSITIS</b>                         | 0 | 0 | 1 | 0 |
| <b>ADMINISTRATION SITE HAEMATOMA</b>           | 1 | 0 | 0 | 0 |
| <b>ADMINISTRATION SITE MOVEMENT IMPAIRMENT</b> | 0 | 1 | 0 | 0 |
| <b>ADVERSE EVENT</b>                           | 0 | 1 | 0 | 0 |
| <b>AFFECTIVE DISORDER</b>                      | 1 | 0 | 0 | 0 |
| <b>AGITATION</b>                               | 1 | 0 | 0 | 0 |
| <b>ALANINE AMINOTRANSFERASE INCREASED</b>      | 1 | 0 | 0 | 0 |
| <b>ALLERGY TO CHEMICALS</b>                    | 0 | 0 | 1 | 0 |
| <b>ANAEMIA</b>                                 | 1 | 0 | 0 | 0 |
| <b>ANAL ERYTHEMA</b>                           | 0 | 1 | 0 | 0 |
| <b>ANAPHYLACTIC REACTION</b>                   | 0 | 0 | 0 | 1 |
| <b>ANGINA PECTORIS</b>                         | 1 | 0 | 0 | 0 |
| <b>ANGIOEDEMA</b>                              | 0 | 1 | 0 | 0 |
| <b>ANXIETY DISORDER</b>                        | 0 | 0 | 0 | 1 |
| <b>APNOEA TEST ABNORMAL</b>                    | 0 | 1 | 0 | 0 |
| <b>APPENDICITIS</b>                            | 0 | 0 | 1 | 0 |
| <b>APPETITE DISORDER</b>                       | 0 | 0 | 1 | 0 |
| <b>ARTHROPOD BITE</b>                          | 0 | 1 | 0 | 0 |
| <b>ARTHROPOD STING</b>                         | 1 | 0 | 0 | 0 |
| <b>ATRIOVENTRICULAR BLOCK COMPLETE</b>         | 0 | 1 | 0 | 0 |
| <b>AURA</b>                                    | 0 | 1 | 0 | 0 |

|                                      |   |   |   |   |
|--------------------------------------|---|---|---|---|
| AXILLARY LYMPHADENECTOMY             | 0 | 1 | 0 | 0 |
| BACTERIAL INFECTION                  | 0 | 0 | 1 | 0 |
| BACTERIAL VAGINOSIS                  | 1 | 0 | 0 | 0 |
| BENIGN BREAST NEOPLASM               | 1 | 0 | 0 | 0 |
| BILIARY COLIC                        | 0 | 1 | 0 | 0 |
| BINGE EATING                         | 0 | 1 | 0 | 0 |
| BLINDNESS                            | 0 | 1 | 0 | 0 |
| BLOOD ALKALINE PHOSPHATASE INCREASED | 1 | 0 | 0 | 0 |
| BLOOD BLISTER                        | 1 | 0 | 0 | 0 |
| BLOOD GLUCOSE DECREASED              | 1 | 0 | 0 | 0 |
| BLOOD LOSS ANAEMIA                   | 0 | 1 | 0 | 0 |
| BLOOD PRESSURE ABNORMAL              | 1 | 0 | 0 | 0 |
| BLOOD PRESSURE DIASTOLIC DECREASED   | 1 | 0 | 0 | 0 |
| BLOOD PRESSURE SYSTOLIC INCREASED    | 1 | 0 | 0 | 0 |
| BLOOD TEST ABNORMAL                  | 0 | 1 | 0 | 0 |
| BODY TEMPERATURE ABNORMAL            | 1 | 0 | 0 | 0 |
| BRADYKINESIA                         | 0 | 0 | 0 | 1 |
| BREAST INFLAMMATION                  | 0 | 0 | 0 | 1 |
| BRONCHIAL IRRITATION                 | 1 | 0 | 0 | 0 |
| BURSA DISORDER                       | 0 | 1 | 0 | 0 |
| CANDIDA INFECTION                    | 0 | 1 | 0 | 0 |
| CAPILLARITIS                         | 0 | 1 | 0 | 0 |
| CEREBROVASCULAR ACCIDENT             | 0 | 1 | 0 | 0 |
| CHRONIC PIGMENTED PURPURA            | 1 | 0 | 0 | 0 |
| CONJUNCTIVITIS                       | 0 | 1 | 0 | 0 |
| CORNEAL DISORDER                     | 0 | 1 | 0 | 0 |
| CORNEAL IRRITATION                   | 0 | 1 | 0 | 0 |
| CROHN'S DISEASE                      | 0 | 0 | 1 | 0 |
| CYANOSIS                             | 0 | 1 | 0 | 0 |
| CYST                                 | 0 | 0 | 0 | 1 |
| DAYDREAMING                          | 0 | 0 | 1 | 0 |
| DEHYDRATION                          | 1 | 0 | 0 | 0 |
| DEPRESSED LEVEL OF CONSCIOUSNESS     | 0 | 1 | 0 | 0 |
| DERMATITIS                           | 0 | 1 | 0 | 0 |
| DERMATITIS BULLOUS                   | 0 | 1 | 0 | 0 |
| DIABETES MELLITUS INADEQUATE CONTROL | 0 | 0 | 1 | 0 |
| DIAPHRAGMATIC SPASM                  | 1 | 0 | 0 | 0 |
| DIARRHOEA HAEMORRHAGIC               | 1 | 0 | 0 | 0 |
| DISSOCIATION                         | 1 | 0 | 0 | 0 |
| DYSARTHRIA                           | 0 | 1 | 0 | 0 |
| DYSPNOEA AT REST                     | 0 | 1 | 0 | 0 |
| EAR CONGESTION                       | 1 | 0 | 0 | 0 |
| EAR HAEMORRHAGE                      | 1 | 0 | 0 | 0 |
| EAR PRURITUS                         | 0 | 0 | 0 | 1 |
| ECZEMA EYELIDS                       | 0 | 1 | 0 | 0 |
| ENERGY INCREASED                     | 0 | 0 | 1 | 0 |
| EOSINOPHIL COUNT INCREASED           | 0 | 0 | 0 | 1 |
| EPIGASTRIC DISCOMFORT                | 1 | 0 | 0 | 0 |

|                                     |   |   |   |   |
|-------------------------------------|---|---|---|---|
| EPILEPTIC AURA                      | 1 | 0 | 0 | 0 |
| ERYTHEMA INDURATUM                  | 0 | 1 | 0 | 0 |
| ERYTHEMA MIGRANS                    | 1 | 0 | 0 | 0 |
| EXECUTIVE DYSFUNCTION               | 1 | 0 | 0 | 0 |
| EXTERNAL EAR INFLAMMATION           | 1 | 0 | 0 | 0 |
| EXTERNAL EAR PAIN                   | 0 | 1 | 0 | 0 |
| EYE DISCHARGE                       | 0 | 1 | 0 | 0 |
| EYE HAEMATOMA                       | 1 | 0 | 0 | 0 |
| EYE PARAESTHESIA                    | 0 | 1 | 0 | 0 |
| EYELID IRRITATION                   | 1 | 0 | 0 | 0 |
| EYELID PAIN                         | 0 | 1 | 0 | 0 |
| EYELID RASH                         | 0 | 1 | 0 | 0 |
| EYELIDS PRURITUS                    | 0 | 0 | 0 | 1 |
| FACIAL PARESIS                      | 1 | 0 | 0 | 0 |
| FAECAL VOLUME INCREASED             | 0 | 1 | 0 | 0 |
| FOETAL GROWTH RESTRICTION           | 0 | 0 | 1 | 0 |
| FOOD CRAVING                        | 0 | 0 | 1 | 0 |
| FUNGAL INFECTION                    | 0 | 0 | 0 | 1 |
| FUNGAL PHARYNGITIS                  | 0 | 1 | 0 | 0 |
| FUNGAL SKIN INFECTION               | 1 | 0 | 0 | 0 |
| GAMMA-GLUTAMYLTRANSFERASE INCREASED | 1 | 0 | 0 | 0 |
| GASTRIC PH DECREASED                | 1 | 0 | 0 | 0 |
| GASTRIC ULCER                       | 1 | 0 | 0 | 0 |
| GASTROENTERITIS                     | 1 | 0 | 0 | 0 |
| GASTROENTERITIS VIRAL               | 0 | 1 | 0 | 0 |
| GASTROINTESTINAL DISORDER           | 0 | 0 | 1 | 0 |
| GASTROINTESTINAL INFLAMMATION       | 1 | 0 | 0 | 0 |
| GASTROINTESTINAL STOMA COMPLICATION | 0 | 1 | 0 | 0 |
| GIANT CELL ARTERITIS                | 0 | 1 | 0 | 0 |
| GLAUCOMA                            | 0 | 1 | 0 | 0 |
| GLOSSITIS                           | 0 | 1 | 0 | 0 |
| HABIT COUGH                         | 1 | 0 | 0 | 0 |
| HAEMANGIOMA                         | 1 | 0 | 0 | 0 |
| HAEMATOCHESIA                       | 1 | 0 | 0 | 0 |
| HAEMOGLOBIN INCREASED               | 0 | 0 | 1 | 0 |
| HALLUCINATION, AUDITORY             | 0 | 0 | 1 | 0 |
| HALLUCINATION, VISUAL               | 1 | 0 | 0 | 0 |
| HANGOVER                            | 0 | 0 | 0 | 1 |
| HEART RATE                          | 0 | 1 | 0 | 0 |
| HEART RATE VARIABILITY INCREASED    | 1 | 0 | 0 | 0 |
| HEPATIC ENZYME ABNORMAL             | 0 | 0 | 1 | 0 |
| HERPES VIRUS INFECTION              | 1 | 0 | 0 | 0 |
| HICCUPS                             | 0 | 1 | 0 | 0 |
| HORDEOLUM                           | 1 | 0 | 0 | 0 |
| HORMONE LEVEL ABNORMAL              | 1 | 0 | 0 | 0 |
| HYPERTONIA                          | 1 | 0 | 0 | 0 |
| HYPOHIDROSIS                        | 1 | 0 | 0 | 0 |

|                                                 |   |   |   |   |
|-------------------------------------------------|---|---|---|---|
| <b>HYPOMENORRHOEA</b>                           | 1 | 0 | 0 | 0 |
| <b>HYPOPNOEA</b>                                | 0 | 0 | 0 | 1 |
| <b>HYPORESPONSIVE TO STIMULI</b>                | 1 | 0 | 0 | 0 |
| <b>HYPOTHYROIDISM</b>                           | 1 | 0 | 0 | 0 |
| <b>ILLNESS</b>                                  | 1 | 0 | 0 | 0 |
| <b>IMPLANT SITE PAIN</b>                        | 0 | 1 | 0 | 0 |
| <b>IMPLANT SITE PRURITUS</b>                    | 1 | 0 | 0 | 0 |
| <b>INCREASED INSULIN REQUIREMENT</b>            | 0 | 0 | 1 | 0 |
| <b>INCREASED UPPER AIRWAY SECRETION</b>         | 0 | 1 | 0 | 0 |
| <b>INFREQUENT BOWEL MOVEMENTS</b>               | 0 | 1 | 0 | 0 |
| <b>INJECTION SITE ABSCESS</b>                   | 0 | 0 | 1 | 0 |
| <b>INJECTION SITE EXTRAVASATION</b>             | 1 | 0 | 0 | 0 |
| <b>INJECTION SITE JOINT MOVEMENT IMPAIRMENT</b> | 0 | 1 | 0 | 0 |
| <b>INJECTION SITE JOINT PAIN</b>                | 0 | 1 | 0 | 0 |
| <b>INJECTION SITE MASS</b>                      | 1 | 0 | 0 | 0 |
| <b>INJECTION SITE OEDEMA</b>                    | 1 | 0 | 0 | 0 |
| <b>INJECTION SITE VESICLES</b>                  | 0 | 0 | 1 | 0 |
| <b>INNER EAR DISORDER</b>                       | 0 | 0 | 1 | 0 |
| <b>INTERNAL HAEMORRHAGE</b>                     | 0 | 1 | 0 | 0 |
| <b>INTESTINAL OBSTRUCTION</b>                   | 0 | 0 | 1 | 0 |
| <b>IRON DEFICIENCY</b>                          | 0 | 0 | 0 | 1 |
| <b>IRREGULAR BREATHING</b>                      | 0 | 0 | 1 | 0 |
| <b>JAW DISORDER</b>                             | 0 | 0 | 0 | 1 |
| <b>JOINT DISLOCATION</b>                        | 1 | 0 | 0 | 0 |
| <b>JOINT RANGE OF MOTION DECREASED</b>          | 0 | 0 | 1 | 0 |
| <b>LABILE BLOOD PRESSURE</b>                    | 0 | 1 | 0 | 0 |
| <b>LARYNGEAL DISCOMFORT</b>                     | 1 | 0 | 0 | 0 |
| <b>LAZINESS</b>                                 | 0 | 0 | 1 | 0 |
| <b>LETHARGY</b>                                 | 0 | 0 | 0 | 1 |
| <b>LIBIDO INCREASED</b>                         | 0 | 0 | 0 | 1 |
| <b>LICHEN PLANUS</b>                            | 0 | 0 | 1 | 0 |
| <b>LICHEN SCLEROSUS</b>                         | 0 | 0 | 1 | 0 |
| <b>LIMB INJURY</b>                              | 0 | 1 | 0 | 0 |
| <b>LIP BLISTER</b>                              | 1 | 0 | 0 | 0 |
| <b>LIP OEDEMA</b>                               | 1 | 0 | 0 | 0 |
| <b>LIPODYSTROPHY ACQUIRED</b>                   | 0 | 0 | 1 | 0 |
| <b>LIPOMA</b>                                   | 0 | 0 | 1 | 0 |
| <b>LIVEDO RETICULARIS</b>                       | 1 | 0 | 0 | 0 |
| <b>LIVER FUNCTION TEST INCREASED</b>            | 1 | 0 | 0 | 0 |
| <b>LUNG DISORDER</b>                            | 0 | 0 | 0 | 1 |
| <b>LYMPHADENITIS</b>                            | 1 | 0 | 0 | 0 |
| <b>MASTICATION DISORDER</b>                     | 1 | 0 | 0 | 0 |
| <b>MASTITIS</b>                                 | 0 | 0 | 1 | 0 |
| <b>MATERNAL EXPOSURE DURING BREAST FEEDING</b>  | 0 | 1 | 0 | 0 |
| <b>MEDICAL DEVICE DISCOMFORT</b>                | 0 | 1 | 0 | 0 |
| <b>MEDICAL DEVICE SITE HYPERSENSITIVITY</b>     | 1 | 0 | 0 | 0 |

|                                 |   |   |   |   |
|---------------------------------|---|---|---|---|
| MEDICAL DEVICE SITE PAIN        | 0 | 1 | 0 | 0 |
| MENIERE'S DISEASE               | 0 | 0 | 1 | 0 |
| MENISCUS INJURY                 | 1 | 0 | 0 | 0 |
| MENTAL DISORDER                 | 0 | 1 | 0 | 0 |
| MERALGIA PARAESTHETICA          | 1 | 0 | 0 | 0 |
| MICROCYTOSIS                    | 1 | 0 | 0 | 0 |
| MICTURITION DISORDER            | 0 | 1 | 0 | 0 |
| MIDDLE INSOMNIA                 | 1 | 0 | 0 | 0 |
| MOUTH INJURY                    | 0 | 0 | 1 | 0 |
| MULTIPLE SCLEROSIS RELAPSE      | 0 | 0 | 1 | 0 |
| MUSCLE SPASTICITY               | 0 | 1 | 0 | 0 |
| MUSCLE SWELLING                 | 0 | 0 | 0 | 1 |
| MYDRIASIS                       | 0 | 1 | 0 | 0 |
| MYOCARDITIS                     | 0 | 1 | 0 | 0 |
| MYOSCLEROSIS                    | 0 | 1 | 0 | 0 |
| NASAL HERPES                    | 1 | 0 | 0 | 0 |
| NIPPLE INFLAMMATION             | 0 | 1 | 0 | 0 |
| NON-CARDIAC CHEST PAIN          | 1 | 0 | 0 | 0 |
| OCCULT BLOOD POSITIVE           | 0 | 1 | 0 | 0 |
| OEDEMA                          | 1 | 0 | 0 | 0 |
| OEDEMA BLISTER                  | 0 | 0 | 1 | 0 |
| ONYCHOCLASIS                    | 0 | 1 | 0 | 0 |
| ONYCHOMYCOSIS                   | 1 | 0 | 0 | 0 |
| ORAL BLOOD BLISTER              | 1 | 0 | 0 | 0 |
| ORAL CANDIDIASIS                | 0 | 1 | 0 | 0 |
| ORAL FUNGAL INFECTION           | 0 | 0 | 0 | 1 |
| ORAL MUCOSAL DISCOLOURATION     | 0 | 1 | 0 | 0 |
| ORAL MUCOSAL ERUPTION           | 0 | 1 | 0 | 0 |
| OSTEITIS                        | 0 | 0 | 0 | 1 |
| OSTEOARTHRITIS                  | 0 | 1 | 0 | 0 |
| OSTEOMYELITIS                   | 1 | 0 | 0 | 0 |
| PALATE INJURY                   | 1 | 0 | 0 | 0 |
| PANIC REACTION                  | 0 | 0 | 0 | 1 |
| PARANOIA                        | 0 | 1 | 0 | 0 |
| PERICARDITIS                    | 0 | 1 | 0 | 0 |
| PETIT MAL EPILEPSY              | 0 | 1 | 0 | 0 |
| PHARYNGEAL ERYTHEMA             | 0 | 1 | 0 | 0 |
| PHARYNGEAL HYPOAESTHESIA        | 1 | 0 | 0 | 0 |
| PHOTOSENSITIVITY REACTION       | 0 | 0 | 1 | 0 |
| PITYRIASIS ROSEA                | 1 | 0 | 0 | 0 |
| PLATELET COUNT DECREASED        | 0 | 0 | 1 | 0 |
| PLATELET COUNT INCREASED        | 0 | 1 | 0 | 0 |
| PLEURAL EFFUSION                | 0 | 1 | 0 | 0 |
| PLEURISY                        | 0 | 0 | 0 | 1 |
| POLYDIPSIA                      | 1 | 0 | 0 | 0 |
| POST HERPETIC NEURALGIA         | 0 | 1 | 0 | 0 |
| PRE-EXISTING CONDITION IMPROVED | 0 | 1 | 0 | 0 |
| PREMENSTRUAL PAIN               | 1 | 0 | 0 | 0 |

|                                   |   |   |   |   |
|-----------------------------------|---|---|---|---|
| PRURITUS ALLERGIC                 | 1 | 0 | 0 | 0 |
| PSEUDOHALLUCINATION               | 1 | 0 | 0 | 0 |
| PULMONARY OEDEMA                  | 0 | 1 | 0 | 0 |
| PUPILLARY DISORDER                | 0 | 0 | 0 | 1 |
| PUSTULE                           | 0 | 1 | 0 | 0 |
| RASH MACULO-PAPULAR               | 1 | 0 | 0 | 0 |
| RASH MORBILLIFORM                 | 0 | 1 | 0 | 0 |
| RENAL DISORDER                    | 0 | 0 | 1 | 0 |
| RESPIRATION ABNORMAL              | 1 | 0 | 0 | 0 |
| RESPIRATORY ARREST                | 1 | 0 | 0 | 0 |
| RETINAL DETACHMENT                | 1 | 0 | 0 | 0 |
| RETINAL MIGRAINE                  | 0 | 1 | 0 | 0 |
| RHEUMATOID ARTHRITIS              | 1 | 0 | 0 | 0 |
| SALIVARY GLAND ENLARGEMENT        | 1 | 0 | 0 | 0 |
| SARS-COV-1 TEST POSITIVE          | 0 | 0 | 0 | 1 |
| SARS-COV-2 ANTIBODY TEST NEGATIVE | 0 | 1 | 0 | 0 |
| SCAR PAIN                         | 0 | 0 | 0 | 1 |
| SCROTAL SWELLING                  | 0 | 1 | 0 | 0 |
| SEBACEOUS GLANDS OVERACTIVITY     | 0 | 0 | 0 | 1 |
| SEIZURE                           | 0 | 1 | 0 | 0 |
| SENSE OF OPPRESSION               | 0 | 1 | 0 | 0 |
| SINUS HEADACHE                    | 0 | 1 | 0 | 0 |
| SKIN HAEMORRHAGE                  | 1 | 0 | 0 | 0 |
| SKIN INFECTION                    | 1 | 0 | 0 | 0 |
| SKIN WARM                         | 0 | 0 | 1 | 0 |
| SKIN WOUND                        | 0 | 1 | 0 | 0 |
| SLOW SPEECH                       | 0 | 1 | 0 | 0 |
| SLUGGISHNESS                      | 0 | 0 | 0 | 1 |
| SPEECH DISORDER                   | 0 | 0 | 0 | 1 |
| SPIDER VEIN                       | 1 | 0 | 0 | 0 |
| STOMATITIS                        | 1 | 0 | 0 | 0 |
| STRESS                            | 0 | 0 | 0 | 1 |
| SUBCUTANEOUS ABSCESS              | 0 | 0 | 1 | 0 |
| SUBCUTANEOUS HAEMATOMA            | 0 | 0 | 0 | 1 |
| SUDDEN ONSET OF SLEEP             | 0 | 0 | 1 | 0 |
| SUNBURN                           | 1 | 0 | 0 | 0 |
| SUPPRESSED LACTATION              | 1 | 0 | 0 | 0 |
| SUPRAVENTRICULAR EXTRASYSTOLES    | 0 | 1 | 0 | 0 |
| TEETHING                          | 0 | 0 | 1 | 0 |
| TENDONITIS                        | 0 | 1 | 0 | 0 |
| TESTICULAR PAIN                   | 0 | 0 | 0 | 1 |
| THROMBOSED VARICOSE VEIN          | 0 | 1 | 0 | 0 |
| THROMBOSIS                        | 1 | 0 | 0 | 0 |
| THYROID DISORDER                  | 1 | 0 | 0 | 0 |
| TINEA PEDIS                       | 1 | 0 | 0 | 0 |
| TONGUE DRY                        | 0 | 1 | 0 | 0 |
| TONGUE GEOGRAPHIC                 | 0 | 1 | 0 | 0 |
| TONGUE INJURY                     | 1 | 0 | 0 | 0 |

|                                               |   |   |   |   |
|-----------------------------------------------|---|---|---|---|
| <b>TONGUE PRURITUS</b>                        | 0 | 0 | 1 | 0 |
| <b>TONGUE ROUGH</b>                           | 1 | 0 | 0 | 0 |
| <b>TOOTH EXTRACTION</b>                       | 0 | 1 | 0 | 0 |
| <b>TRACHEAL PAIN</b>                          | 0 | 0 | 0 | 1 |
| <b>TRISMUS</b>                                | 1 | 0 | 0 | 0 |
| <b>URINARY TRACT DISCOMFORT</b>               | 0 | 1 | 0 | 0 |
| <b>URINARY TRACT INFECTION</b>                | 0 | 0 | 0 | 1 |
| <b>URINE OUTPUT DECREASED</b>                 | 1 | 0 | 0 | 0 |
| <b>VACCINATION SITE DRYNESS</b>               | 1 | 0 | 0 | 0 |
| <b>VACCINATION SITE LYMPHADENOPATHY</b>       | 0 | 1 | 0 | 0 |
| <b>VACCINATION SITE PARAESTHESIA</b>          | 0 | 0 | 1 | 0 |
| <b>VASCULAR RESISTANCE SYSTEMIC DECREASED</b> | 1 | 0 | 0 | 0 |
| <b>VASCULITIS</b>                             | 1 | 0 | 0 | 0 |
| <b>VEIN DISORDER</b>                          | 0 | 1 | 0 | 0 |
| <b>VISUAL ACUITY REDUCED</b>                  | 1 | 0 | 0 | 0 |
| <b>VITAMIN B12 DEFICIENCY</b>                 | 0 | 0 | 0 | 1 |
| <b>VITREOUS HAEMORRHAGE</b>                   | 0 | 0 | 1 | 0 |
| <b>VOMITING PSYCHOGENIC</b>                   | 0 | 0 | 1 | 0 |
| <b>VULVOVAGINAL DISCOMFORT</b>                | 1 | 0 | 0 | 0 |
| <b>VULVOVAGINAL MYCOTIC INFECTION</b>         | 1 | 0 | 0 | 0 |
| <b>VULVOVAGINAL PRURITUS</b>                  | 0 | 0 | 1 | 0 |
| <b>VULVOVAGINAL RASH</b>                      | 0 | 1 | 0 | 0 |
| <b>WEIGHT ABNORMAL</b>                        | 0 | 0 | 0 | 1 |
| <b>WEIGHT DECREASED</b>                       | 0 | 1 | 0 | 0 |
| <b>WOUND HAEMORRHAGE</b>                      | 1 | 0 | 0 | 0 |
